## CORRECTION

# Correction: mHealth intervention to improve quality of life in patients with chronic diseases during the COVID-19 crisis in Paraguay: A study protocol for a randomized controlled trial

The *PLOS One* Staff

The affiliation for the 12<sup>th</sup> author is incorrect. Marta Miragall is not affiliated with #4 but with #5: Department of Personality, Evaluation and Psychological Treatment, Faculty of Psychology, University of Valencia, Valencia, Spain.

The publisher apologizes for the error.

## Reference

1. Escrivá-Martínez T, Vara MD, Czeraniuk N, Denis M, Núñez-Benjumea FJ, Fernández-Luque L, et al. (2022) mHealth intervention to improve quality of life in patients with chronic diseases during the COVID-19 crisis in Paraguay: A study protocol for a randomized controlled trial. PLoS ONE 17(11): e0273290. <https://doi.org/10.1371/journal.pone.0273290> PMID: 36346807

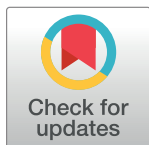

## OPEN ACCESS

**Citation:** The *PLOS One* Staff (2024) Correction: mHealth intervention to improve quality of life in patients with chronic diseases during the COVID-19 crisis in Paraguay: A study protocol for a randomized controlled trial. PLoS ONE 19(5): e0303726. <https://doi.org/10.1371/journal.pone.0303726>

**Published:** May 9, 2024

**Copyright:** © 2024 The PLOS One Staff. This is an open access article distributed under the terms of the [Creative Commons Attribution License](https://creativecommons.org/licenses/by/4.0/), which permits unrestricted use, distribution, and reproduction in any medium, provided the original author and source are credited.
